# Supplementary material
Source: PubMed Central journal article supplement (PMC4204399)
Supplement: NIHMS566427-supplement-Supplementary_File.pdf [file NIHMS566427-supplement-Supplementary_File.pdf]

# ADVANCED FUNCTIONAL MATERIALS

## Supporting Information

for *Adv. Funct. Mater.*, DOI: 10.1002/adfm.201302859

### Multilayered Inorganic Microparticles for Tunable Dual Growth Factor Delivery

*Xiaohua Yu, Andrew Khalil, Phuong Ngoc Dang, Eben  
Alsberg, and William L. Murphy\**

DOI: 10.1002/adfm.201302859

**Supporting Information for  
Multilayered Inorganic Microparticles for Tunable Dual Growth Factor Delivery**

*Xiaohua Yu, Phuong Ngoc Dang, Eben Alsberg, William L. Murphy\**

Dr. X. Yu, Prof. W.L. Murphy  
Department of Biomedical Engineering, University of Wisconsin, Madison, WI 53706,  
USA

Prof. W.L. Murphy  
Department of Orthopedics and Rehabilitation, University of Wisconsin, Madison, WI  
53705, USA

P.N. Dang, Prof. E. Alsberg  
Department of Biomedical Engineering and Orthopaedic Surgery, Case Western Reserve  
University, Cleveland, OH 44106, USA

Prof. W.L. Murphy, Prof. E. Alsberg  
AO Foundation Collaborative Research Center, Davos, Switzerland

\*To whom correspondence should be addressed.  
William L. Murphy, Ph.D  
Department of Biomedical Engineering  
University of Wisconsin  
1111 Highland Ave  
Madison, WI 53705  
Tel.: + 1 608 262 2224  
Fax: + 1 608 265 9239  
E-mail address: wlmurphy@wisc.edu (W.L. Murphy)

Table S-1 Chemical recipe for mSBF formulation with different ionic compositions<sup>1</sup>

| Reagent<br>(mM)                 | mSBF Type     |                                    |               |                                    |                           |                                                |
|---------------------------------|---------------|------------------------------------|---------------|------------------------------------|---------------------------|------------------------------------------------|
|                                 | <b>4.2 mM</b> | <b>4.2 mM</b><br>W/ F <sup>-</sup> | <b>100 mM</b> | <b>100 mM</b><br>W/ F <sup>-</sup> | <b>No Mg<sup>2+</sup></b> | <b>No Mg<sup>2+</sup></b><br>W/ F <sup>-</sup> |
| NaCl                            | 141.0         | 141.0                              | 141.0         | 141.0                              | 141.0                     | 141.0                                          |
| KCl                             | 4.0           | 4.0                                | 4.0           | 4.0                                | 4.0                       | 4.0                                            |
| MgSO <sub>4</sub>               | <b>0.5</b>    | <b>0.5</b>                         | <b>0.5</b>    | <b>0.5</b>                         | <b>0.0</b>                | <b>0.0</b>                                     |
| MgCl <sub>2</sub>               | <b>1.0</b>    | <b>1.0</b>                         | <b>1.0</b>    | <b>1.0</b>                         | <b>0.0</b>                | <b>0.0</b>                                     |
| NaHCO <sub>3</sub>              | <b>4.2</b>    | <b>4.2</b>                         | <b>100</b>    | <b>100</b>                         | <b>4.2</b>                | <b>4.2</b>                                     |
| HEPES                           | 20.0          | 20.0                               | 20.0          | 20.0                               | 20.0                      | 20.0                                           |
| CaCl <sub>2</sub>               | 5.0           | 5.0                                | 5.0           | 5.0                                | 5.0                       | 5.0                                            |
| KH <sub>2</sub> PO <sub>4</sub> | 2.0           | 2.0                                | 2.0           | 2.0                                | 2.0                       | 2.0                                            |
| NaF                             | <b>0.0</b>    | <b>1.0</b>                         | <b>0.0</b>    | <b>1.0</b>                         | <b>0.0</b>                | <b>1.0</b>                                     |

1. The pH of all mSBFs were buffered to 6.80 using HCl/NaOH.

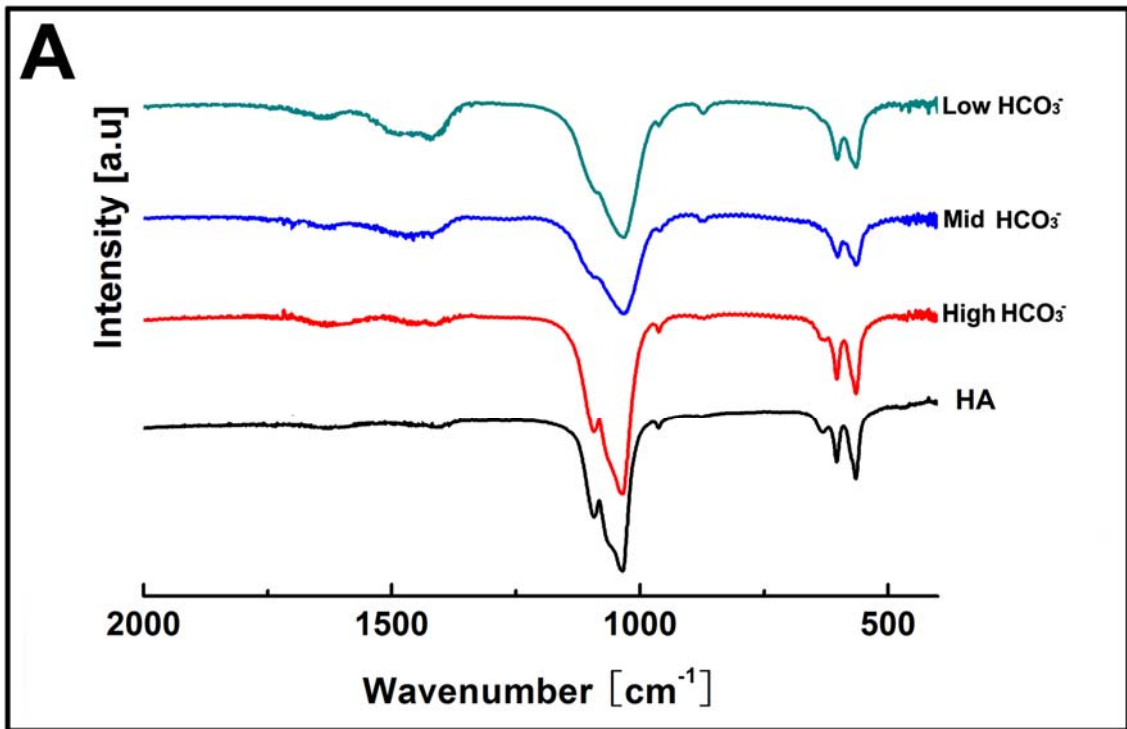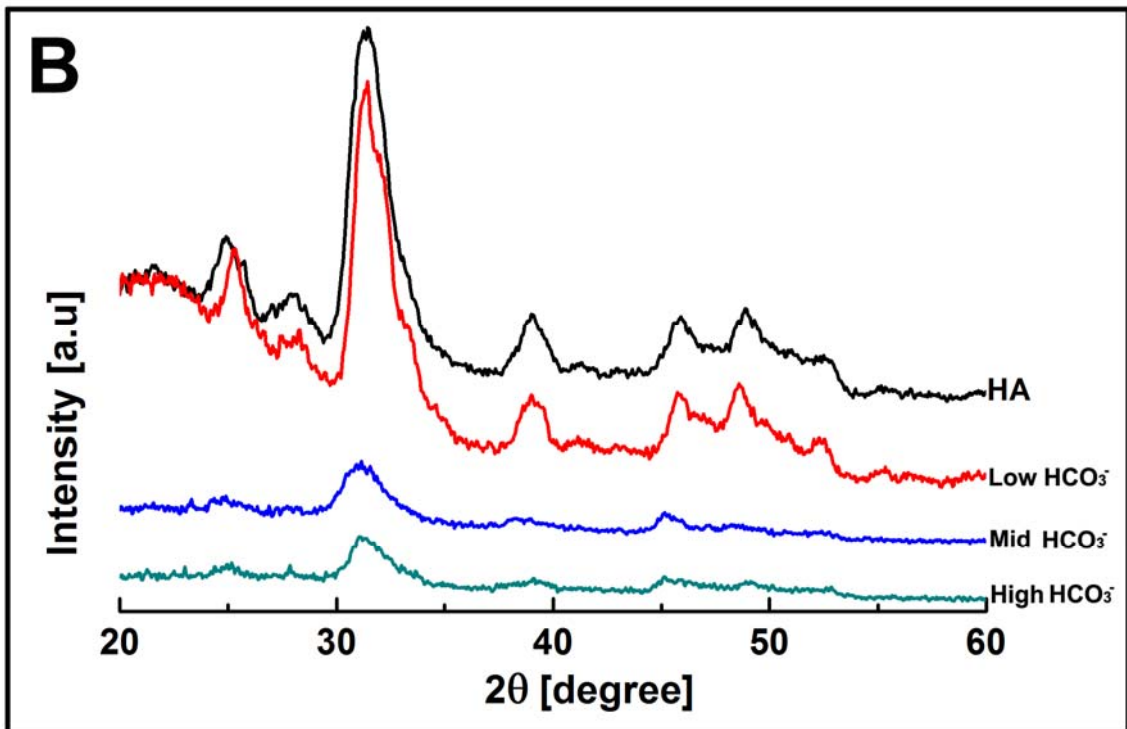

Fig. S-1 Mineral coating characterization: A) X-ray diffraction patterns of MCMs with varying carbonate substitution B) FTIR spectra of MCMs with varying carbonate substitution

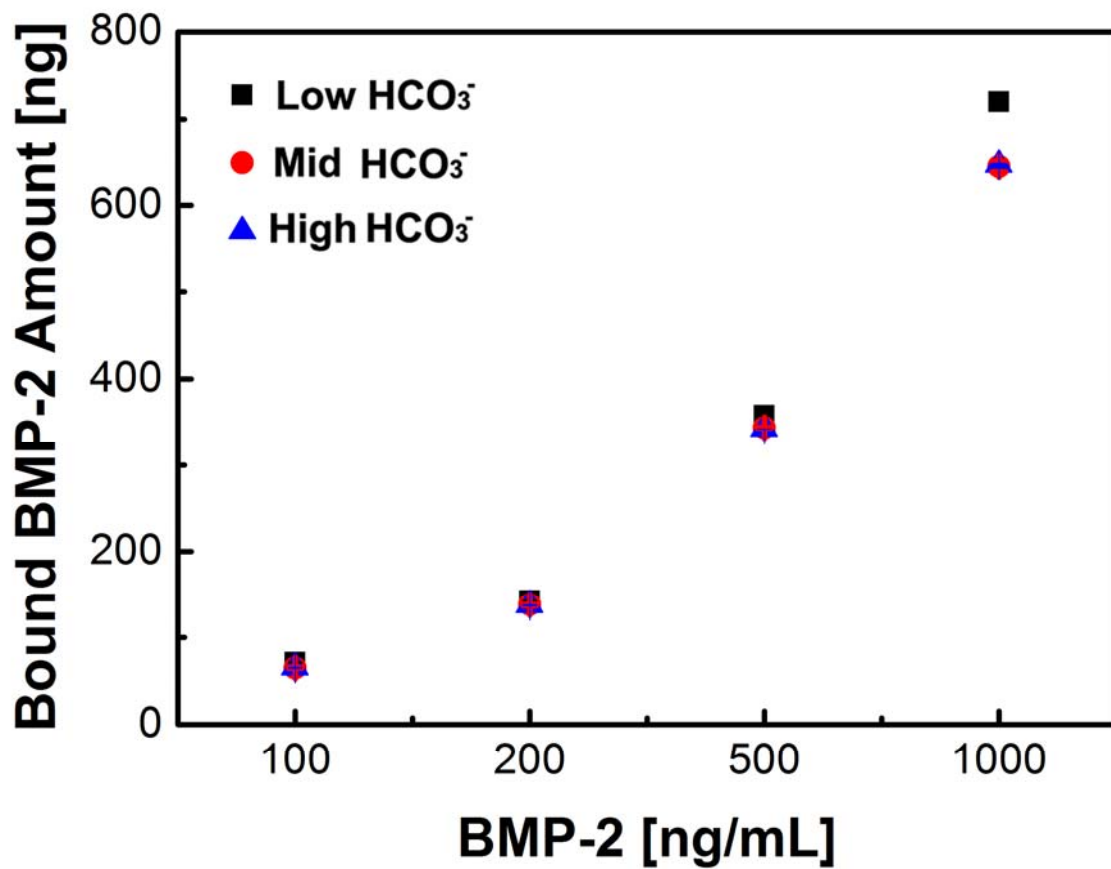

Fig. S-2 BMP-2 binding profiles with different BMP-2 concentrations in PBS during MCMs incubation: 5.0 mg of MCMs with different carbonate substitution was incubated in 1.0 mL BMP-2 solution with different concentrations

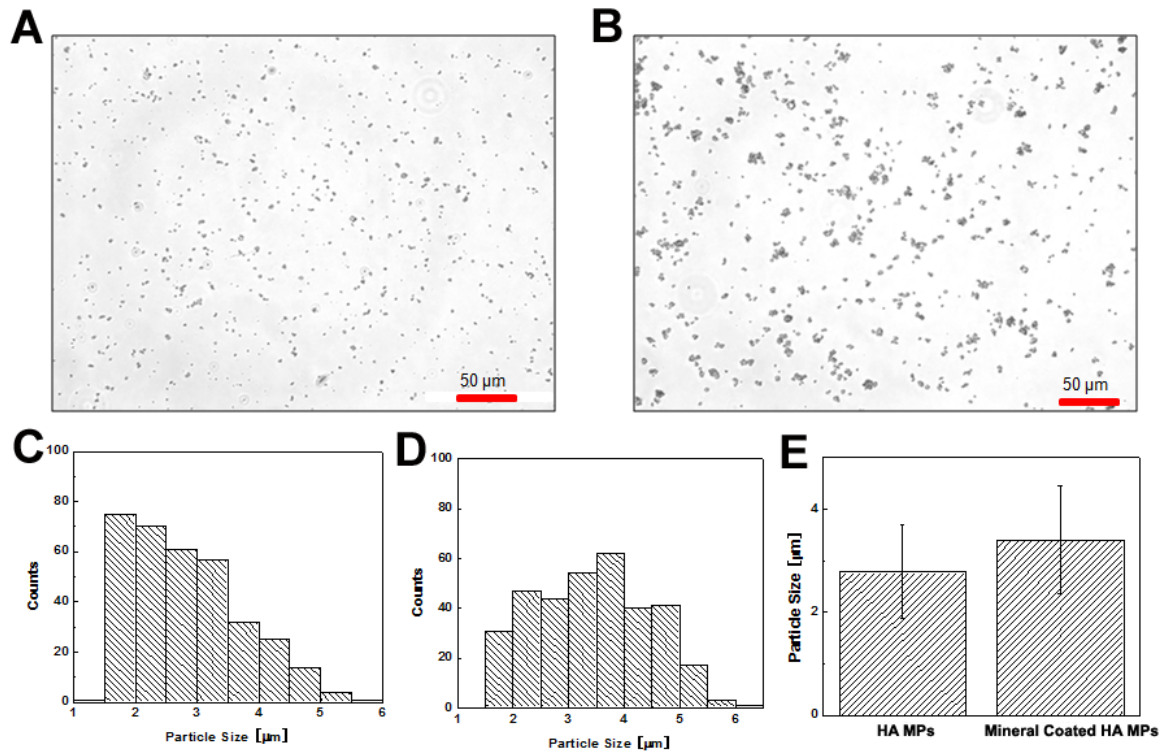

Fig. S-3 MCMs particle size characterization: A) Micrograph of HA MPs without mineral coating B) Micrograph of MCMs C) Particle size distribution of HA MPs D) Particles size distribution of MCMs E) Average size of HA MPs and MCMs

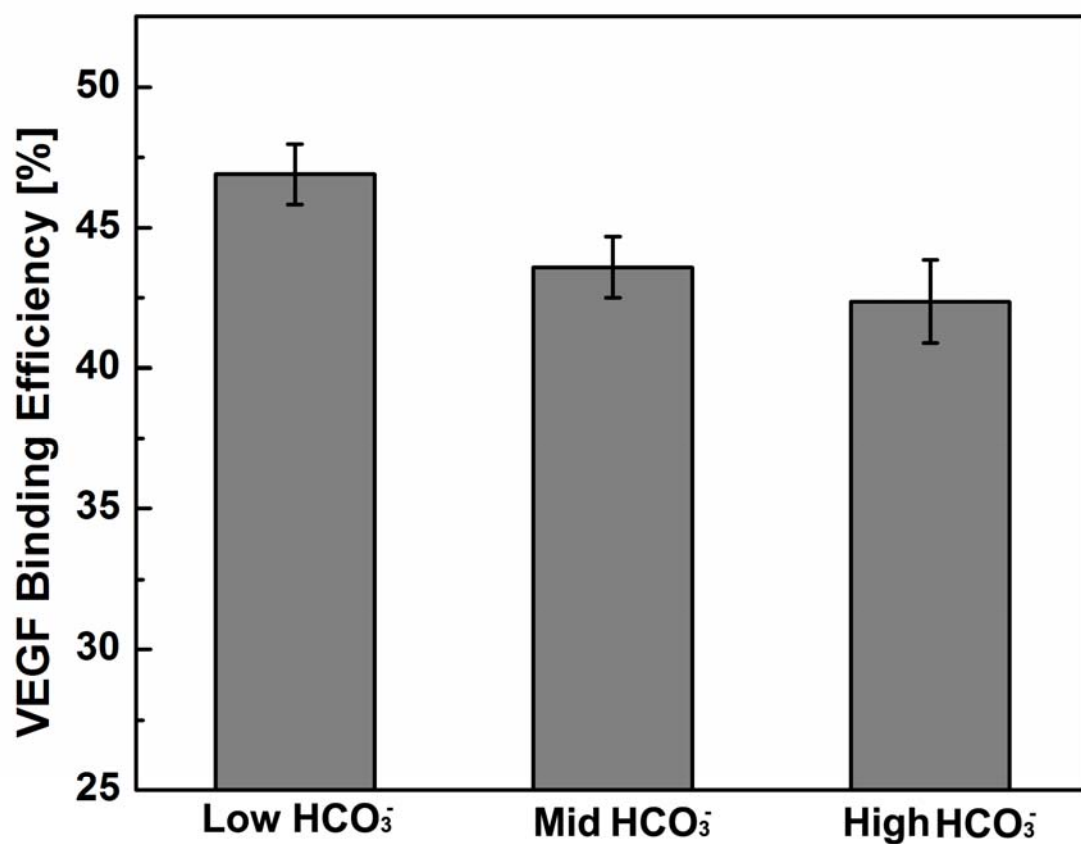

Fig. S-4 VEGF binding efficiency on MCMs with different carbonate substitution
